# Supplementary material
Source: PubMed Central journal article supplement (PMC3404295)

## Supplemental figures

### Figure legends

**Knockdown of Akt using the specific siRNA duplex against both Akt1 and Akt2. A.** Representative blot of Akt1 (from three independent experiments); **B.** Quantification of changes of Akt1; \* $p < 0.001$  compared to the control group (n=3). **C.** Representative blot of Akt2 (from three independent experiments); **D.** Quantification of changes of Akt2; \* $p < 0.05$  compared to the control group (n=3).

# Supplemental figures

**A**

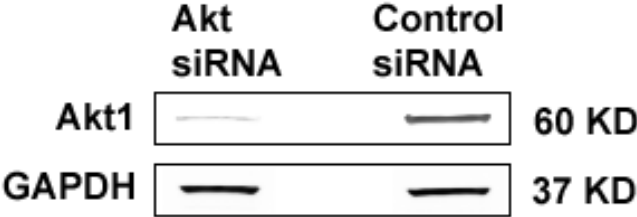

**B**

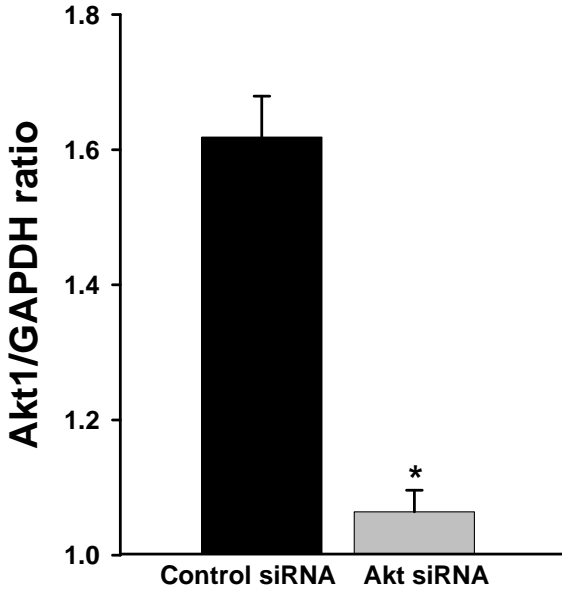

**C**

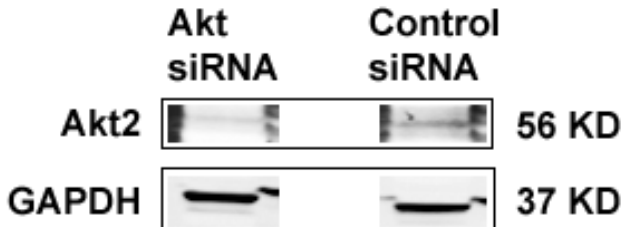

**D**

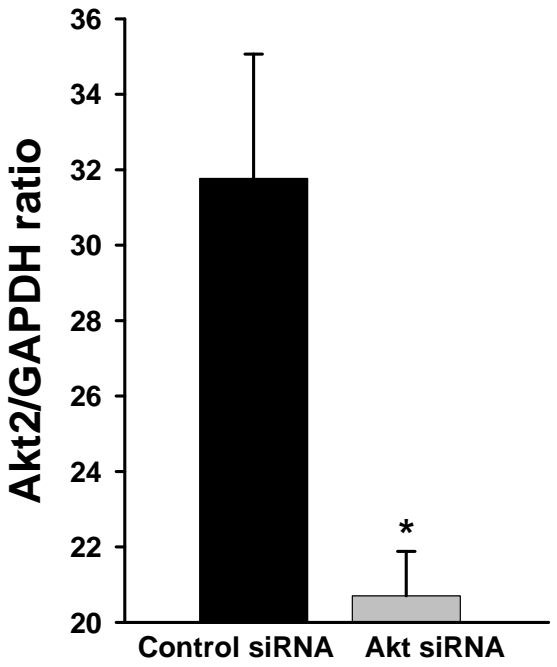

Supplement: supp_me.2012-1003_me-12-1003_Supplemental_figures_final-4-11-12.pdf [file supp_me.2012-1003_me-12-1003_Supplemental_figures_final-4-11-12.pdf]
